# Supplementary material for: Implementing universal Lynch syndrome screening (IMPULSS): protocol for a multi-site study to identify strategies to implement, adapt, and sustain genomic medicine programs in different organizational contexts
Source: PubMed Central journal article supplement (PMC6208012; doi:10.1186/s12913-018-3636-2), 2018-10-30
Supplement: 12913_2018_3636_MOESM1_ESM.pdf [file 12913_2018_3636_MOESM1_ESM.pdf]

# Optimal Lynch Syndrome Screening Program Protocol

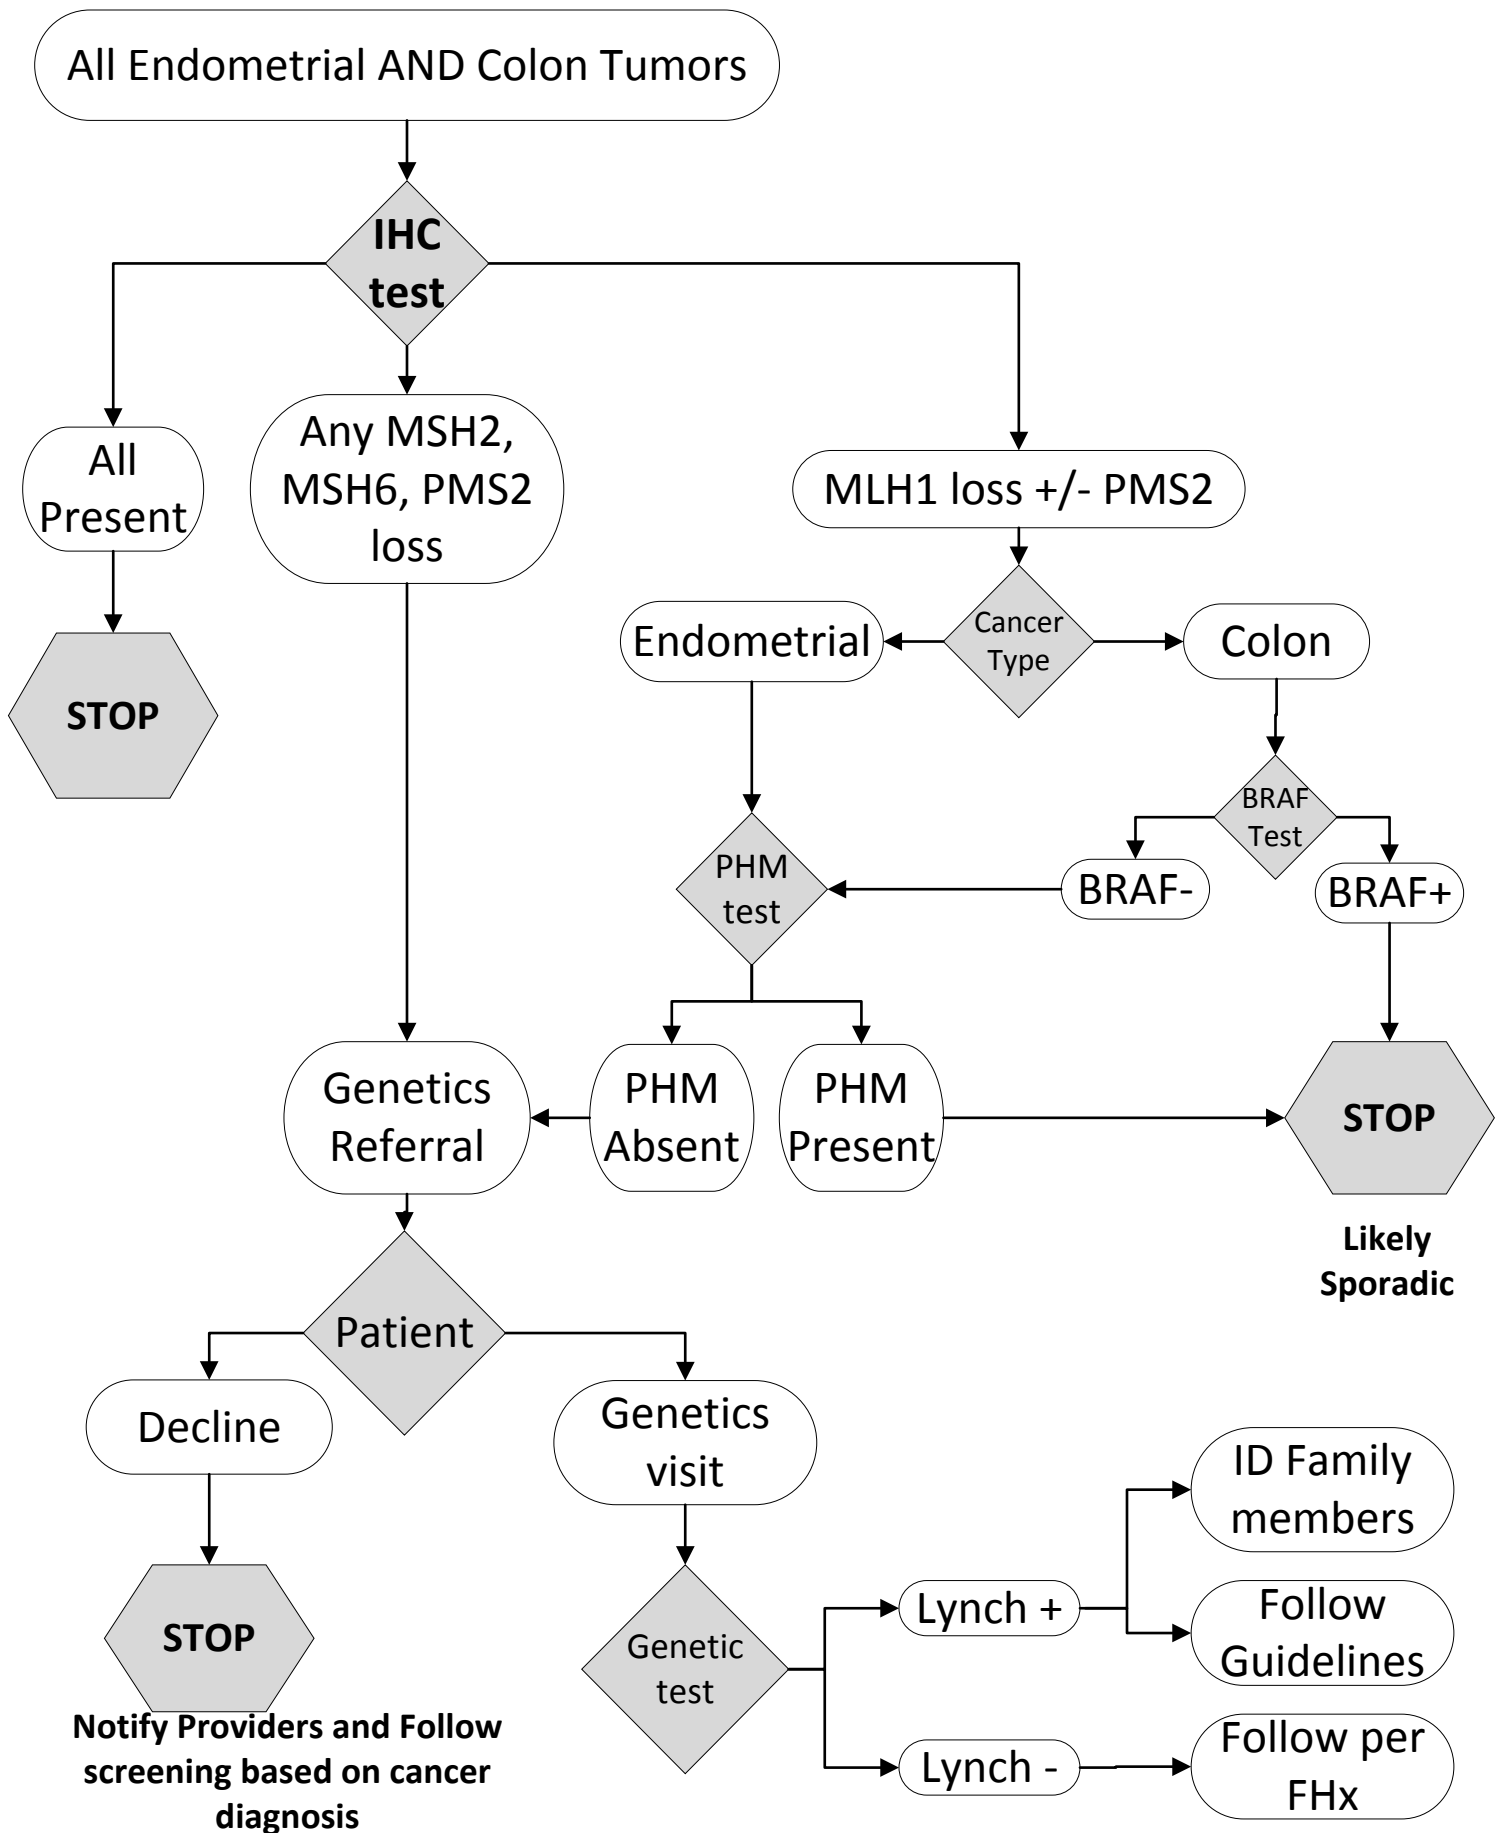

PHM: Promoter hypermethylation; IHC: Immunohistochemistry; FHx: Family History
